# Supplementary material
Source: PubMed Central journal article supplement (PMC4572504)
Supplement: NIHMS709749-supplement-Appendix_Tables_1-4_How_Much_Favorable_Selection.pdf [file NIHMS709749-supplement-Appendix_Tables_1-4_How_Much_Favorable_Selection.pdf]

Appendix Table 1a: Unadjusted expenditures by Year and Switching Status

Non-institutionalized Duals

|      | Stay in TM in next Year |        |        | Switch to HMO in Next Year |       |        |
|------|-------------------------|--------|--------|----------------------------|-------|--------|
|      | N                       | Mean   | SD     | N                          | Mean  | SD     |
| 2001 | 380,492                 | 7,277  | 14,437 | 2,732                      | 6,925 | 14,772 |
| 2002 | 395,135                 | 8,376  | 16,866 | 3,023                      | 7,881 | 15,810 |
| 2003 | 412,942                 | 8,969  | 17,326 | 5,216                      | 7,653 | 16,084 |
| 2004 | 404,749                 | 9,214  | 17,675 | 12,546                     | 8,225 | 16,357 |
| 2005 | 389,618                 | 9,574  | 18,379 | 39,323                     | 7,973 | 15,659 |
| 2006 | 375,952                 | 9,756  | 18,745 | 28,342                     | 8,885 | 16,522 |
| 2007 | 367,100                 | 9,953  | 19,349 | 23,563                     | 8,722 | 16,203 |
| 2008 | 408,096                 | 10,357 | 19,788 | 20,555                     | 8,865 | 17,365 |
| 2009 | 419,309                 | 10,803 | 20,709 | 18,297                     | 9,527 | 17,780 |
| 2010 | 427,833                 | 10,665 | 20,520 | 18,567                     | 9,052 | 17,715 |

\*2007\$ The following types of beneficiaries were excluded from the sample: Beneficiaries whose original eligibility was attributable to disability, ESRD, or Alzheimer's; newly eligible beneficiaries (since no prior claims information was available); beneficiaries who did not have 12 months of continuous enrollment in TM, both Parts A and B, in the prior year; the institutionalized; and dual eligibles. In addition, beneficiaries who switched into cost MA plans or special needs plans were excluded.

Appendix Table 1b: Unadjusted Risk Scores\* by Year and Switching Status

Non-institutionalized Duals

|      | Stay in TM in next Year |        |        | Switch to HMO in Next Year |       |       |
|------|-------------------------|--------|--------|----------------------------|-------|-------|
|      | N                       | Mean   | SD     | N                          | Mean  | SD    |
| 2001 | 380,492                 | 1.2801 | 0.9305 | 2,732                      | 1.184 | 0.848 |
| 2002 | 395,135                 | 1.3362 | 0.9960 | 3,023                      | 1.211 | 0.897 |
| 2003 | 412,942                 | 1.3731 | 1.0317 | 5,216                      | 1.191 | 0.926 |
| 2004 | 404,749                 | 1.3772 | 1.0385 | 12,546                     | 1.253 | 0.931 |
| 2005 | 389,618                 | 1.3979 | 1.0533 | 39,323                     | 1.277 | 0.938 |
| 2006 | 375,952                 | 1.4243 | 1.0818 | 28,342                     | 1.342 | 0.989 |
| 2007 | 367,100                 | 1.4336 | 1.0814 | 23,563                     | 1.322 | 0.981 |
| 2008 | 408,096                 | 1.4099 | 1.0215 | 20,555                     | 1.284 | 0.922 |
| 2009 | 419,309                 | 1.4403 | 1.0304 | 18,297                     | 1.299 | 0.943 |
| 2010 | 427,833                 | 1.3692 | 0.9835 | 18,567                     | 1.228 | 0.888 |

\* Risk scores are computed using the 2007 CMS-HCC model.

Appendix Table 2a: Unadjusted expenditures\* by Year and Switching Status

Institutionalized

|      | Stay in TM in next Year |        |        | Switch to HMO in Next Year |        |        |
|------|-------------------------|--------|--------|----------------------------|--------|--------|
|      | N                       | Mean   | SD     | N                          | Mean   | SD     |
| 2001 | 421,423                 | 21,860 | 30,161 | 2,748                      | 23,305 | 28,939 |
| 2002 | 423,218                 | 17,899 | 27,276 | 2,469                      | 20,997 | 28,985 |
| 2003 | 345,235                 | 19,144 | 28,250 | 2,384                      | 20,662 | 30,462 |
| 2004 | 356,336                 | 19,949 | 29,052 | 3,819                      | 21,077 | 30,964 |
| 2005 | 351,318                 | 20,738 | 29,846 | 9,952                      | 18,285 | 27,269 |
| 2006 | 345,477                 | 20,996 | 30,421 | 8,070                      | 20,755 | 30,130 |
| 2007 | 340,690                 | 21,491 | 30,918 | 8,636                      | 20,910 | 29,790 |
| 2008 | 334,485                 | 22,264 | 31,560 | 6,161                      | 20,742 | 28,957 |
| 2009 | 336,523                 | 23,393 | 33,289 | 6,192                      | 23,283 | 32,872 |
| 2010 | 341,551                 | 23,560 | 33,600 | 5,151                      | 23,015 | 32,490 |

\*2007\$. The following types of beneficiaries were excluded from the sample: Beneficiaries whose original eligibility was attributable to disability, ESRD, or Alzheimer's; newly eligible beneficiaries (since no prior claims information was available); beneficiaries who did not have 12 months of continuous enrollment in TM, both Parts A and B, in the prior year. In addition, beneficiaries who switched into cost MA plans or special needs plans were excluded.

Appendix Table 2b: Institutionalized: Unadjusted Risk Scores by Year and Switching Status

Institutionalized

|      | Stay in TM in next Year |       |       | Switch to HMO in Next Year |       |       |
|------|-------------------------|-------|-------|----------------------------|-------|-------|
|      | N                       | Mean  | SD    | N                          | Mean  | SD    |
| 2001 | 421,423                 | 1.797 | 1.050 | 2,748                      | 1.815 | 1.018 |
| 2002 | 423,218                 | 1.720 | 0.999 | 2,469                      | 1.780 | 0.991 |
| 2003 | 345,235                 | 1.751 | 1.031 | 2,384                      | 1.731 | 0.975 |
| 2004 | 356,336                 | 1.753 | 1.036 | 3,819                      | 1.747 | 0.989 |
| 2005 | 351,318                 | 1.774 | 1.057 | 9,952                      | 1.717 | 0.977 |
| 2006 | 345,477                 | 1.793 | 1.068 | 8,070                      | 1.800 | 1.047 |
| 2007 | 340,690                 | 1.801 | 1.072 | 8,636                      | 1.786 | 1.026 |
| 2008 | 334,485                 | 1.751 | 0.987 | 6,161                      | 1.717 | 0.921 |
| 2009 | 336,523                 | 1.767 | 0.984 | 6,192                      | 1.768 | 0.951 |
| 2010 | 341,551                 | 1.687 | 0.946 | 5,151                      | 1.702 | 0.922 |

Risk scores are computed using the 2007 CMS-HCC model.

Appendix Table 3a: Unadjusted expenditures by Year and Switching Status, Non-Institutionalized, Non-Duals\*

|      | Stay in TM in next Year |         |        | Switch to MA-HMO's in Next Year |         |        |
|------|-------------------------|---------|--------|---------------------------------|---------|--------|
|      | N                       | Mean \$ | SD     | N                               | Mean \$ | SD     |
| 2001 | 3,731,431               | 5,325   | 11,144 | 23,966                          | 3,714   | 8,691  |
| 2002 | 3,851,378               | 6,001   | 13,034 | 24,988                          | 4,033   | 9,725  |
| 2003 | 3,971,622               | 6,358   | 13,433 | 37,727                          | 4,210   | 9,524  |
| 2004 | 3,927,310               | 6,651   | 13,837 | 58,207                          | 4,657   | 10,288 |
| 2005 | 3,789,618               | 6,871   | 14,169 | 87,142                          | 4,766   | 10,257 |
| 2006 | 3,687,693               | 6,958   | 14,406 | 53,373                          | 5,279   | 11,456 |
| 2007 | 3,610,107               | 7,016   | 14,527 | 70,898                          | 5,389   | 11,705 |
| 2008 | 3,531,134               | 7,015   | 14,670 | 74,039                          | 4,940   | 10,973 |
| 2009 | 3,537,119               | 7,263   | 15,349 | 85,114                          | 5,662   | 12,796 |

\*2007\$ The following types of beneficiaries were excluded from the sample: Beneficiaries whose original eligibility was attributable to disability, ESRD, or Alzheimer's; newly eligible beneficiaries (since no prior claims information was available); beneficiaries who did not have 12 months of continuous enrollment in TM, both Parts A and B, in the prior year; the institutionalized; and dual eligibles. In addition, beneficiaries who switched into PFFS, cost MA plans or special needs plans were excluded. MA-PPO enrollees are included. 2010 values are not shown in this table because we are unable to identify the type of MA plan that was chosen in 2010.

Appendix Table 3b: Unadjusted Risk Scores\* by Year and Switching Status, Non-Institutionalized, Non-Duals

|      | Stay in TM in next Year |            |       | Switch to MA-HMO's in Next Year |            |       |
|------|-------------------------|------------|-------|---------------------------------|------------|-------|
|      | N                       | Mean Score | SD    | N                               | Mean Score | SD    |
| 2001 | 3,731,431               | 0.922      | 0.760 | 23,966                          | 0.786      | 0.658 |
| 2002 | 3,851,378               | 0.953      | 0.817 | 24,988                          | 0.806      | 0.689 |
| 2003 | 3,971,622               | 0.976      | 0.844 | 37,727                          | 0.817      | 0.695 |
| 2004 | 3,927,310               | 0.983      | 0.852 | 58,207                          | 0.860      | 0.737 |
| 2005 | 3,789,618               | 1.000      | 0.868 | 87,142                          | 0.872      | 0.735 |
| 2006 | 3,687,693               | 1.018      | 0.886 | 53,373                          | 0.897      | 0.785 |
| 2007 | 3,610,107               | 1.023      | 0.881 | 70,898                          | 0.901      | 0.779 |
| 2008 | 3,531,134               | 1.004      | 0.829 | 74,039                          | 0.850      | 0.702 |
| 2009 | 3,537,119               | 1.010      | 0.838 | 85,114                          | 0.891      | 0.751 |

\*Risk scores are computed using the 2007 CMS-HCC model.

Appendix Table 4a: Unadjusted expenditures by Year and Switching Status, Non-Institutionalized, Non-Duals\*

|      | Stay in TM in next Year |         |        | Switch to MA-PFFS in Next Year |         |        |
|------|-------------------------|---------|--------|--------------------------------|---------|--------|
|      | N                       | Mean \$ | SD     | N                              | Mean \$ | SD     |
| 2001 | 3,731,431               | 5,325   | 11,144 | 596                            | 4,764   | 9,445  |
| 2002 | 3,851,378               | 6,001   | 13,034 | 1,141                          | 3,416   | 7,155  |
| 2003 | 3,971,622               | 6,358   | 13,433 | 4,071                          | 3,934   | 8,345  |
| 2004 | 3,927,310               | 6,651   | 13,837 | 18,986                         | 4,286   | 9,323  |
| 2005 | 3,789,618               | 6,871   | 14,169 | 73,088                         | 4,668   | 10,153 |
| 2006 | 3,687,693               | 6,958   | 14,406 | 108,380                        | 5,982   | 12,175 |
| 2007 | 3,610,107               | 7,016   | 14,527 | 85,829                         | 6,180   | 12,621 |
| 2008 | 3,531,134               | 7,015   | 14,670 | 52,816                         | 5,982   | 12,739 |
| 2009 | 3,537,119               | 7,263   | 15,349 | 26,502                         | 6,143   | 13,253 |

\*2007\$. The following types of beneficiaries were excluded from the sample: Beneficiaries whose original eligibility was attributable to disability ,ESRD, or Alzheimer's; newly eligible beneficiaries (since no prior claims information was available); beneficiaries who did not have 12 months of continuous enrollment in TM, both Parts A and B, in the prior year; the institutionalized; and dual eligibles. In addition, beneficiaries who switched into cost MA plans or special needs plans were excluded. 2010 values are not shown in this table because we are unable to identify the type of MA plan that was chosen in 2010.

Appendix Table 4b: Unadjusted Risk Scores\* by Year and Switching Status Non-Institutionalized, Non-Duals

|      | Stay in TM in next Year |            |       | Switch to MA-PFFS in Next Year |            |        |
|------|-------------------------|------------|-------|--------------------------------|------------|--------|
|      | N                       | Mean Score | SD    | N                              | Mean Score | SD     |
| 2001 | 3,731,431               | 0.922      | 0.760 | 596                            | 0.8728     | 0.6707 |
| 2002 | 3,851,378               | 0.953      | 0.817 | 1,141                          | 0.7611     | 0.6425 |
| 2003 | 3,971,622               | 0.976      | 0.844 | 4,071                          | 0.7346     | 0.5912 |
| 2004 | 3,927,310               | 0.983      | 0.852 | 18,986                         | 0.7849     | 0.6379 |
| 2005 | 3,789,618               | 1.000      | 0.868 | 73,088                         | 0.8308     | 0.6918 |
| 2006 | 3,687,693               | 1.018      | 0.886 | 108,380                        | 0.9416     | 0.8072 |
| 2007 | 3,610,107               | 1.023      | 0.881 | 85,829                         | 0.9849     | 0.8379 |
| 2008 | 3,531,134               | 1.004      | 0.829 | 52,816                         | 0.9286     | 0.7666 |
| 2009 | 3,537,119               | 1.010      | 0.838 | 26,502                         | 0.9221     | 0.7565 |

\*Risk scores are computed using the 2007 CMS-HCC model.
